# Supplementary material for: Direct repression of the oncogene CDK4 by the tumor suppressor miR-486-5p in non-small cell lung cancer
Source: PubMed Central journal article supplement (PMC5085134; doi:10.18632/oncotarget.8514), 2016-03-31
Supplement: oncotarget-07-34011-s001.pdf [file oncotarget-07-34011-s001.pdf]

## SUPPLEMENTARY TABLES

Supplementary Table S1: Descriptive characteristics of samples

| Characteristic     | Adenocarcinoma (n=28) | Squamous Cell carcinoma (n=10) |
|--------------------|-----------------------|--------------------------------|
| Median age (range) | 65 (47-78)            | 65 (53-71)                     |
| Gender             |                       |                                |
| Male               | 16 (50%)              | 9 (90%)                        |
| Female             | 12 (50%)              | 1 (10%)                        |
| Stage, n (%)       |                       |                                |
| I A                | 6 (21.4%)             | 3 (30%)                        |
| I B                | 8 (28.6%)             | 1 (10%)                        |
| II A               | 3 (10.7%)             | 2 (20%)                        |
| II B               | 2 (7.1%)              | 1 (10%)                        |
| III A              | 6 (21.4%)             | 2 (20%)                        |
| III B              | 0 (0%)                | 1 (10%)                        |
| IV                 | 3 (10.7%)             | 0 (0%)                         |

Supplementary Table S2: PCR primers

| Primer Name         | Primer Sequences                                                                                                                   |
|---------------------|------------------------------------------------------------------------------------------------------------------------------------|
| Methylated Primer   | Forward: GGTAGTTAGGATTCGGAGAC<br>Reverse: GAAAACCTAAACCAACGACGT                                                                    |
| Unmethylated Primer | Forward: GAGGTAGTTAGGAGTTTGGAGAT<br>Reverse: CAAAAACTAAACCAACAACATA                                                                |
| CDK4 WT 3'-UTR      | Forward: GCTCTAGAGCCATTTCCCTTCTGGACACTG<br>Reverse: GGAATTCATCTCGGCTCACCGCAACCT                                                    |
| CDK4 mut 3'-UTR     | Forward: ATATTTGGGGTCCTTTTTTACATATGAAAAA<br>CAAAACAAAGAAATAATGG<br>Reverse: CCATTATTTCTTTGTTTTGTTTTTCATATGTAAAAAAG<br>GACCCCAAATAT |
